# Supplementary material
Source: PubMed Central journal article supplement (PMC2742831)

Supplemental Figure. Interaction of the BFNC causing L339R mutant with endogenous calmodulin. Protein complexes from HEK293T cells expressing the indicated Myc-tagged KCNQ2 subunits were immunoprecipitated with an anti-Myc antibody. The CaM bands revealed with an anti-CaM antibody (bottom) and the KCNQ2 channel subunits bands revealed with anti-Myc antibody (top) are indicated by arrowheads. Two different amounts of the sample corresponding to the wt channel subunit were loaded (far right and far left lanes; right line adding half the amount than in the right lane) to facilitate comparison among the samples.

Supplemental figure

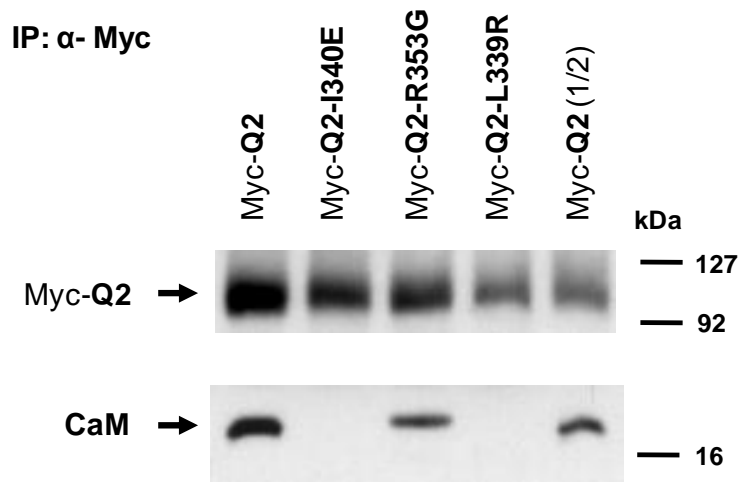

Supplement: supp_M109.019539_jbc.M109.019539-1.pdf [file supp_M109.019539_jbc.M109.019539-1.pdf]
